# Supplementary material for: The Relative Importance of Janzen-Connell Effects in Influencing the Spatial Patterns at the Gutianshan Subtropical Forest
Source: PLOS journal article supplement (doi:10.1371/journal.pone.0074560), 2013-09-05
Supplement: S4 (10.1371/journal.pone.0074560.s004) [file journal.pone.0074560.s004]

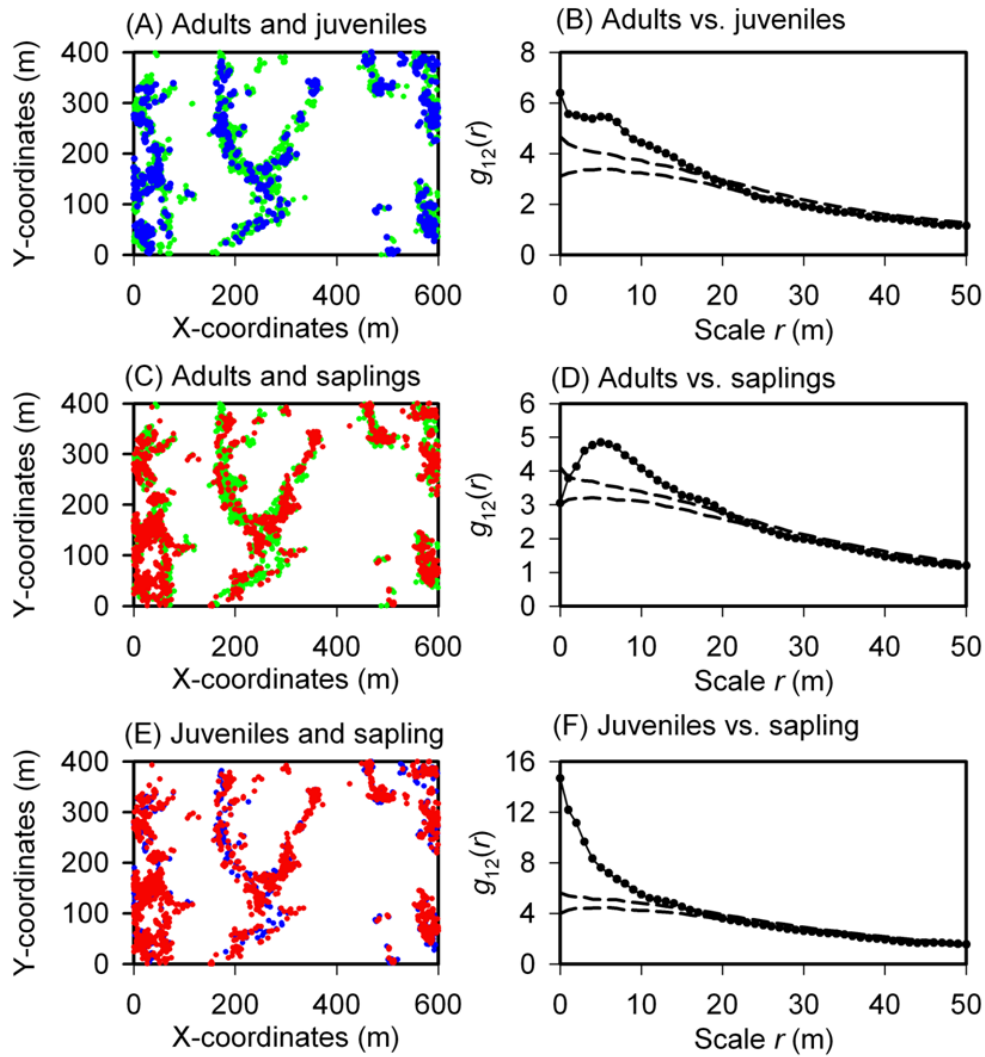

**Figure S4. Examples for analyses of the association between different life stages for the species *Distylium myricoides*.** The bivariate pair-correlation function  $g_{12}(r)$  was contrasted to the heterogeneous Poisson null model. The simulation envelopes (dashed lines) were constructed using the 5th-lowest and 5th-highest  $g(r)$  values of 199 Monte Carlo simulations. Solid circles indicate observed point patterns. The density of sapling aggregation peaked at the 5 m distance away from adults (D), while juveniles and adults showed closer spatial aggregation at scales below 5 m (B) than saplings and adults. Between saplings and juveniles,

they had the closest association compared to offspring-adult associations (F). The ring width was 3 m. (A), (C), (E) the distribution of each pair of life stages in the plot (green circles for adults, blue circles for juveniles, red circles for saplings).
